1 **Performance of *Orbicella faveolata* larval cohorts does not align with previously**  
2 **observed thermal tolerance of adult source populations**

3  
4 Yingqi Zhang<sup>\*1</sup>, Shelby E. Gantt<sup>2</sup>, Elise F. Keister<sup>2</sup>, Holland Elder<sup>1</sup>, Graham Kolodziej<sup>3,4</sup>,  
5 Catalina Aguilar<sup>3,4</sup>, Michael S. Studivan<sup>3,4</sup>, Dana E. Williams<sup>5</sup>, Dustin W. Kemp<sup>2</sup>, Derek P.  
6 Manzello<sup>6</sup>, Ian C. Enochs<sup>4</sup>, Carly D. Kenkel<sup>1</sup>

7  
8 <sup>1</sup>University of Southern California, Department of Biological Sciences, 3616 Trousdale Parkway,  
9 Los Angeles, CA 90089

10 <sup>2</sup>University of Alabama at Birmingham, Department of Biology, 1300 University Boulevard,  
11 Birmingham, AL 35233

12 <sup>3</sup>University of Miami, Cooperative Institute for Marine and Atmospheric Studies, 4600  
13 Rickenbacker Causeway, Miami, FL 33149

14 <sup>4</sup>NOAA Atlantic Oceanographic and Meteorological Laboratory, Ocean Chemistry and  
15 Ecosystems Division, 4301 Rickenbacker Causeway, Miami, FL, 33149, USA

16 <sup>5</sup>NOAA Southeast Fisheries Science Center, Population and Ecosystem Monitoring Division, 75  
17 Virginia Beach Drive, Miami, FL 33149

18 <sup>6</sup>Coral Reef Watch, Center for Satellite Applications and Research, Satellite Oceanography &  
19 Climatology Division, U.S. National Oceanic and Atmospheric Administration, MD 20740

20  
21 \*email: [yingqizh@usc.edu](mailto:yingqizh@usc.edu)

22  
23 **Keywords: coral, local adaptation, heritability, global gene expression**

24  
25  
26  
27  
28  
29  
30  
31  
32  
33  
34  
35  
36  
37  
38  
39  
40  
41  
42  
43  
44

45 **Abstract**

46 *Orbicella faveolata*, commonly known as the mountainous star coral, is a dominant reef-building  
47 species in the Caribbean, but populations have suffered sharp declines since the 1980s due to  
48 repeated bleaching and disease-driven mortality. Prior research has shown that inshore adult *O.*  
49 *faveolata* populations in the Florida Keys are able to maintain high coral cover and recover from  
50 bleaching faster than their offshore counterparts. However, whether this origin-specific variation  
51 in thermal resistance is heritable remains unclear. To address this knowledge gap, we produced  
52 purebred and hybrid larval crosses from *O. faveolata* gametes collected at two distinct reefs in  
53 the Upper Florida Keys, a nearshore site (Cheeca Rocks, CR) and an offshore site (Horseshoe  
54 Reef, HR), in two different years (2019, 2021). We then subjected these aposymbiotic larvae to  
55 severe (36 °C) and moderate (32 °C) heat challenges to quantify their thermal tolerance.  
56 Contrary to our expectation based on patterns of adult thermal tolerance, HR purebred larvae  
57 survived better and exhibited gene expression profiles that were less driven by stress response  
58 under elevated temperature compared to purebred CR and hybrid larvae. One potential  
59 explanation could be compromised reproductive output of CR adult colonies due to repeated  
60 summer bleaching events in 2018 and 2019, as gametes originating from CR in 2019 contained  
61 less storage lipids than those from HR. These findings provide an important counter-example to  
62 the current selective breeding paradigm, that more tolerant parents will yield more tolerant  
63 offspring, and highlight the importance of adopting a holistic approach when evaluating larval  
64 quality for conservation and restoration purposes.

65

66

67

68

69

70

## 71 **Introduction**

72 Global ecosystems are undergoing unprecedented structural and functional changes as  
73 atmospheric CO<sub>2</sub> level and temperature continue to rise in the Anthropocene (Steffen et al.,  
74 2007). One ecosystem that is particularly vulnerable to these changes is coral reefs, because  
75 most reef-building corals are found in the tropics (Spalding & Brown, 2015) and already live  
76 close to their upper thermal limits (Baker et al., 2008). A small temperature increase, as little as  
77 1 °C above the maximum monthly mean temperature for a period of four weeks, or four degree  
78 heating weeks (Liu et al., 2005), can lead to the breakdown of the symbiotic relationship  
79 between the cnidarian animal host and their intracellular photosynthetic dinoflagellate algae.  
80 This phenomenon is commonly known as coral bleaching (Hoegh-Guldberg et al., 2007; Lesser,  
81 2011). Worldwide, coral cover is estimated to have declined by 20% over the past 30 years and  
82 reefs will continue to be threatened by large-scale bleaching events even with climate  
83 intervention strategies (Hoegh-Guldberg et al., 2019). Similar to the pattern observed in the  
84 wider Caribbean region (Gardner et al., 2003), coral reefs in the Florida Keys have experienced  
85 drastic population declines since the early 1980s mostly due to bleaching and disease (Dustan  
86 & Halas, 1987; Precht & Miller, 2007). The two most recent large-scale bleaching events to  
87 affect this region occurred in 2014 and 2015 when maximum temperatures exceeded local  
88 bleaching thresholds for over 4-8 weeks (Eakin et al., 2019; Smith et al., 2019).

89  
90 However, not all corals are equally susceptible to bleaching. Coral populations inhabiting  
91 thermally-challenging environments, characterized by elevated temperatures and/or greater  
92 temperature variabilities, have been repeatedly shown to exhibit higher tolerance to heat stress  
93 (Howells et al., 2016; Thomas et al., 2018). Mechanistically, increased temperature tolerance  
94 can be the result of adaptation and/or acclimatization on the part of coral hosts, their  
95 dinoflagellate endosymbionts, or other members of the microbiome (Ainsworth et al., 2016;  
96 Berkelmans & van Oppen, 2006; Palumbi et al., 2014; Santoro et al., 2021). Along the Florida

97 Keys reef tract, inshore patch reefs experience higher annual temperature fluctuations and  
98 elevated mean temperature during bleaching-prone summer months in comparison to offshore  
99 reefs at similar latitudes (Kenkel et al., 2015; Manzello et al., 2015a, 2015b). This spatially-  
100 defined thermal heterogeneity has been theorized to support elevated heat tolerance of inshore  
101 corals, which aligns with lab-based experiments and field-based observations of reduced  
102 bleaching severity of inshore coral populations (Gintert et al., 2018; Kenkel et al., 2013). During  
103 the back-to-back bleaching events in 2014 and 2015, inshore *Orbicella faveolata* colonies in the  
104 Upper and Lower Florida Keys demonstrated lower bleaching prevalence and higher recovery  
105 rate than colonies at paired offshore sites (Manzello et al., 2019). Due to the lack of distinct  
106 genetic structure among inshore and offshore host populations, the increased heat tolerance of  
107 the inshore corals was attributed to the significantly greater prevalence of heat tolerant  
108 symbionts (*Durussdinium trenchii*) in these corals versus those at offshore sites (Manzello et al.,  
109 2019). The host role in shaping holobiont thermotolerance in this system remains unclear.

110

111 Establishing the degree to which the coral host contributes to thermal tolerance is essential for  
112 modeling adaptive potential and implementing intervention strategies. Assisted evolution was  
113 proposed as a suite of intervention approaches to mitigate the decline and degradation of reef  
114 systems, given that adaptive changes that occur naturally might not be able to keep pace with  
115 the rapidly-changing climate (Van Oppen & Oliver, 2015). Studies in multiple Indo-Pacific coral  
116 species provide compelling evidence for host genomic heritability of traits to enhance the  
117 tolerance to heat, ocean acidification, and disease (Dixon et al., 2015; Drury et al., 2022;  
118 Howells et al., 2021; Quigley et al., 2020). Additional data is needed to better understand the  
119 tradeoffs of selecting for a single trait in corals, given their exposure to multiple environmental  
120 challenges (Ladd et al., 2017). This approach may also lead to outbreeding depression and  
121 genetic swamping, which can threaten the survival and fitness of their offspring (Aitken &  
122 Whitlock, 2013). Significant differences in the decline of coral species have been observed in

123 the Pacific and Caribbean regions (Tebbett et al., 2023)). It has been suggested that impaired  
124 colony physiology in corals could contribute to suboptimal larval performance that causes  
125 recruitment failure (Hughes & Tanner, 2000; Williams et al., 2008).

126

127 We investigate how the source population affects the performance of *O. faveolata* offspring. To  
128 do this, we created larval cohorts sourced from parent colonies living in thermally distinct reef  
129 sites in the Upper Florida Keys. We then exposed these aposymbiotic larvae to severe and  
130 moderate temperature stress. *O. faveolata* is one of the major reef-building corals in the Florida  
131 Keys and its populations are highly connected throughout the wider Caribbean seascape  
132 ((Rippe et al., 2017)). However, *O. faveolata* populations have suffered sharp declines in the  
133 past few decades (Edmunds, 2015). These declines are largely due to bleaching and disease,  
134 making recovery challenging (Gladfelter et al., 1978). *Orbicella faveolata* is a hermaphroditic  
135 broadcast-spawning coral species that sexually reproduces during late summer months when  
136 water temperatures are maximal (Szmant, 1991). Symbiotic dinoflagellates are acquired from  
137 the environment during metamorphosis (Coffroth et al., 2001). By working with aposymbiotic  
138 larvae, we can study the physiological and transcriptomic basis for heat tolerance in the animal  
139 host without the confounding effects of symbiosis. Understanding the physiological and genetic  
140 factors underlying origin-dependent bleaching resistance in *O. faveolata* (and congeners) is  
141 crucial because they were listed as threatened under the Endangered Species Act in 2014. By  
142 studying this, we can assess the impact on future generations and estimate adaptive capacity,  
143 enabling informed conservation efforts.

144

## 145 **Methods**

### 146 Sites and Temperature Data

147 Two well-monitored sites in the Upper Florida Keys were chosen for subsequent spawning  
148 collections in 2019 and 2021, including Cheeca Rocks (CR, 24.8977°N, 80.6182°W) and

149 Horseshoe Reef (HR, 25.1388°N, 80.3133°W). Temperature was measured every 3 hrs at the  
150 Cheeca Rocks Moored-Autonomous pCO<sub>2</sub> buoy (MApCO<sub>2</sub>, depth = 1 m) using a conductivity–  
151 temperature sensor (Model SBE-16 plus v. 2.2, Seabird Electronics). Data were collected every  
152 30 min from HR (depth = 3.4 m) using the following loggers: Pendant (from 1/1/2017 to 8/6/2019  
153 09:00 h) and Tidbit MX2204 (8/6/19 09:30 h to 12/31/21). From these data, daily average  
154 temperature and the running 30-day mean temperatures were calculated for each site from  
155 January 1, 2017 to December 31, 2021.

156

157 The bleaching thresholds for CR were determined as previously described (Gintert et al., 2018).  
158 Bleaching thresholds can be estimated for reef sites in the Florida Keys by taking the average of  
159 the maximum monthly mean sea surface temperature (SST) during a non-bleaching year and  
160 the minimum monthly mean SST during a bleaching year (Manzello et al., 2007). Every Florida  
161 Keys-wide mass bleaching event since 2005 has been predicted in near-real-time by calculating  
162 the running 30-day mean SST from the Molasses Reef Coastal Marine Automated Network (C-  
163 MAN) station and using that site as a proxy for the rest of the Florida Keys offshore reef sites  
164 (Manzello, 2015). This technique has also been used to predict every bleaching event that has  
165 occurred at CR since 2012.

166

167 The bleaching threshold for CR is a monthly mean SST  $\geq 31.3^{\circ}\text{C}$ , such that once the running  
168 30-day mean SST reach this value, bleaching has been observed in 2014, 2015, 2018, and  
169 2019 (Gintert et al., 2018; Manzello et al., 2019) (Fig. 1). The monthly mean bleaching threshold  
170 for offshore reefs in the Florida Keys is  $\geq 30.4^{\circ}\text{C}$ , nearly  $1^{\circ}\text{C}$  lower than CR. We lack sufficient  
171 coverage of both bleaching and non-bleaching year temperature data for HR to determine a  
172 local bleaching threshold for this site. However, we can deduce that temperatures experienced  
173 at HR are warmer than the values experienced at the far offshore reefs used for calculation of  
174 the Florida Keys-wide threshold, but cooler than CR (Fig. 1).

175

176 Spawning, cross design and larval rearing

177 Spawning collections were conducted under permit FKNMS-2018-163-A1. The first spawn  
178 occurred on August 22, 2019, seven days after the full moon. Gamete bundles were collected  
179 from five adult colonies within each site using spawning tents with 50 mL collection tubes  
180 following standard protocols (Marhaver et al. 2017). Collection tubes were removed from tents  
181 after ~5 mL of gametes had been collected, immediately capped, and transported back to the  
182 boat by divers. Gametes were then diluted to reach a sperm concentration of  $\sim 10^6$  cells/mL in  
183 individual 5 gallon buckets filled with 0.2  $\mu\text{m}$  filtered seawater (FSW). Three replicate bulk  
184 crosses were created on each boat by mixing equivalent aliquots of diluted gametes from each  
185 colony ( $n = 5$ ) at each site ( $n = 2$ ). Approximately 1.5 hrs post spawning, diluted gametes  
186 released from two CR colonies and three HR colonies were mixed in the laboratory to create  
187 three replicate hybrid bulk crosses. Note that given the optimum fertilization window for gametes  
188 (~2 hrs), there was not sufficient time to separate eggs from sperm to attempt a diallel-type  
189 crossing design. Therefore, the bulk hybrid crosses could include true CR x HR and HR x CR  
190 reciprocal larvae as well as CR x CR and HR x HR fertilizations.

191

192 A second round of *O. faveolata* gamete collection from each site occurred six (28 August, HR  
193 only) and seven (29 August, CR and HR) days after the full moon in August 2021. Gametes  
194 were again obtained from five colonies at HR on day 6, and handled as in 2019, resulting in  
195 three bulk crosses of HR x HR cultures. No spawning was observed at CR on day 6. On day 7,  
196 only a single colony was observed spawning at each site, which restricted our fertilization  
197 design to the creation of hybrid crosses only. Gamete bundles from each site were returned to  
198 the Key Largo Marine Research Laboratory and separated into eggs and sperm by filtration  
199 through an 80  $\mu\text{m}$  nitex mesh, followed by rinsing with FSW. Individual eggs and sperm were

200 crossed to create three culture replicates of each of two hybrid crosses (CR sperm x HR egg,  
201 HR sperm x CR egg).

202

203 For all crosses in each year, successful fertilization was confirmed through observation of initial  
204 cell division under 100x magnification following ~2 hrs of incubation. Developing embryos were  
205 gently rinsed 3x in FSW to remove excess sperm and transferred to 6 L culture bins at a density  
206 of ~1 embryo per mL in FSW. Healthy developing larvae were rinsed and transferred to fresh  
207 FSW twice daily until reaching the planula stage, after which water changes were performed  
208 every other day. Larval cultures were maintained at 29°C by placing filled bins in shallow 32 L  
209 polycarbonate (Rubbermaid) water baths equipped with 100 W aquarium heaters and SL381  
210 submersible pumps (Domica) to maintain ambient temperature consistent with field temperature  
211 profiles.

212

### 213 Thermal stress challenges

214 Two thermal stress experiments were conducted at the Key Largo Marine Research Laboratory  
215 in 2019 after mature swimming larvae were observed in all cultures (CRxCR, HRxHR, putative  
216 hybrid cross), which occurred on day 3 post fertilization: an acute stress at 36 °C and a  
217 moderate stress at 32 °C following (Zhang et al., 2022). For each experiment, six replicate 6 L  
218 polycarbonate larval bins (Vigors) were filled with 0.2 µm FSW and placed into a set of two  
219 shallow 32 L polycarbonate (Rubbermaid) water baths for temperature control (n = 3 larval bins  
220 per bath). Each water bath was filled with ~15 L water and equipped with a SL381 submersible  
221 water pump to maintain circulation and a 100 W aquarium heater. Each larval rearing bin was  
222 fully filled and two of three bins were equipped with HOBO temperature loggers (Onset). For the  
223 acute stress experiment, each larval rearing bin received two groups of ten larvae per bulk cross  
224 (n = 6 per cross type per treatment) that were aliquoted into floating netwells (70 µm cell  
225 strainers, Grenier Bio-One). The control bath remained at 29 °C and the treatment bath was



226 heated up to 36 °C over 24 hrs (Fig. S1a). Mortality was assessed every 24 hrs by counting the  
227 number of surviving larvae in the netwells. The experiment was terminated once mortality  
228 reached more than 50% for the majority of the netwells. For the moderate stress experiment, a  
229 total of 20 larvae from each bulk cross replicate were aliquoted to each netwell. The control bin  
230 remained at 29 °C and the treatment bin was heated up to 32 °C over 24 hrs (Fig. S1a). After 4  
231 days of exposure, swimming larvae were removed from each netwell, flash frozen in liquid  
232 nitrogen, and stored at -80 °C for RNA extraction.

233

234 Similar acute and moderate stress experiments were conducted with larvae reared in 2021 (HR  
235 x HR, CR x HR, HR x CR). All cultures were transported to the Experimental Reef Lab (ERL) at  
236 The University of Miami's Cooperative Institute for Marine and Atmospheric Studies (CIMAS) on  
237 day 4 post fertilization. Larvae were packed into 50 mL centrifuge tubes with no air bubbles and  
238 stored in coolers at ambient temperature during transit. Upon arrival at ERL, larvae were re-  
239 distributed into 6 L culture bins (n = 3 per cross) filled with 0.2 µm FSW. Temperature control  
240 was accomplished using the ERL aquaria with individual treatment tanks serving as water baths  
241 (Enochs et al., 2018). For the stress experiments, netwells were floated directly in the  
242 temperature-controlled flow-through aquaria. For each bulk cross, two groups of 10 larvae were  
243 allocated to each treatment tank in the acute stress treatment (n = 6 per cross type per  
244 treatment) and three groups of 20 larvae were allocated to each treatment tank in the moderate  
245 stress (n = 9 per cross type per treatment). The control temperature for both experiments was  
246 set to 27 °C. Heat ramps started 5 days post fertilization (note this represented different  
247 calendar days for HR x HR vs. CR x HR and HR x CR to account for differences in  
248 developmental age) and target temperatures were reached over 48 hrs (Fig. S1b). Lights were  
249 maintained at 180 µmol s<sup>-1</sup>·m<sup>-2</sup> for a 12:12 hr light dark cycle. The acute stress assay was  
250 monitored every 12 hrs for survival and the experiment was terminated once mortality reached  
251 more than 50% for the majority of the netwells. For the moderate duration experiment, larvae

252 were retrieved from 1 netwell per cross per replicate tank following 4 days of exposure using a  
253 pipette, counted, and transferred to a cryovial for RNA extraction. Excess seawater was  
254 removed and larvae were snap frozen in liquid nitrogen and stored at -80 °C until processing.  
255 Additional replicate samples were taken from the remaining 2 netwells for protein and lipid  
256 analyses.

257

### 258 Physiological assays

259 Gametes from both years, as well as 2021 fertilized larvae, were collected for lipid analyses.

260 Gametes from each parent colony were sampled in duplicate. Gametes and larvae were  
261 counted under a dissection microscope before being transferred to combusted glass tubes and  
262 frozen at -20 °C until lipid processing. Total lipids were extracted and determined gravimetrically  
263 using a modified Folch method (Folch et al., 1957), as described in (Keister et al., 2023).

264 Subsequently, 100% chloroform was added to total lipids to achieve a 10 mg mL<sup>-1</sup>  
265 concentration, to standardize samples. Lipid classes were quantified by spotting, in duplicate, 1  
266 µL of extracted lipids on silica Chromarods<sup>®</sup> before being developed using thin-layer  
267 chromatography via a two-step solvent system (Conlan et al., 2014, 2017; Nichols et al., 2001),  
268 as described in (Keister et al., 2023). Developed rods were then dried at 100 °C for 10 min in an  
269 IsoTemp Oven (Fisher Scientific) before being run on an Iatroscan MK 6S thin-layer flame  
270 ionization detector (TLC-FID). Known concentrations of lipid compounds, ranging from 0.1–10.0  
271 mg mL<sup>-1</sup>, were used to calibrate the Iatroscan for the following lipid classes:

272 phosphatidylethanolamine (PE), phosphatidylserine and phosphatidylinositol (PS-PI),  
273 phosphatidylcholine (PC), lysophosphatidylcholine (LPC), wax esters (WAX), triacylglycerols  
274 (TAG), sterols (ST), and diacylglycerols (DAG). All phospholipid lipid classes (PE, PS-PI, PC,  
275 LPC) were grouped and analyzed as one unit. All total lipid and lipid class values were  
276 presented as µg per gamete or µg per larva, respectively.

277

278 Protein samples were thawed on ice and homogenized by back pipetting in FSW for at least 60  
279 s until no visible cellular debris was present. Total homogenate volume was recorded. Soluble  
280 host protein was quantified in triplicate with a BCA Protein Assay Kit II (BioVision) following the  
281 manufacturer's protocol. Final protein concentration was multiplied by the initial homogenate  
282 volume and then standardized by the number of total sampled larvae.

283

#### 284 Statistical analysis of physiological trait data and survival under acute stress

285 All statistical analyses were conducted in R 4.2.1 (R Core Team, 2022). Traits were evaluated  
286 for normality using the Shapiro-Wilks test and log-transformed if not normally distributed. A two-  
287 way anova was performed to analyze the effects of treatment (levels: control and heat) and  
288 origin (levels: CR x CR, HR x HR) on 2019 gamete lipid content. No statistical analysis of 2021  
289 gametes was possible given that only one CR colony spawned. Larval protein and lipid content  
290 for the 2021 cohorts were analyzed using a two-way anova to analyze the effect of origin  
291 (levels: HR x HR, CR x HR, HR x CR) and treatment (levels: control and heat). A mixed effects  
292 Cox model (Therneau, 2018) was used to model time of death for the acute stress experiment  
293 from both years as a function of treatment and origin, including a random effect of replicate bulk  
294 cross. Due to low mortality rate, HR x HR and control were chosen as the reference level for  
295 each fixed effect to calculate hazard ratio for other levels. A hazard ratio above 1 means a  
296 higher mortality risk and below 1 means a lower mortality risk compared to the reference levels.  
297 The null hypothesis was rejected at an alpha of 0.05.

298

#### 299 RNA extraction, library preparation, and sequencing

300 Total RNA was extracted from frozen samples using the Aurum Total RNA Mini Kit (Bio-Rad).  
301 Samples were back pipetted to ensure complete homogenization after Lysis Solution was  
302 added. Genomic DNA was removed by adding DNase I on-column according to the  
303 manufacturer's instructions. RNA concentration was quantified using a Take2 plate on a

304 Synergy H1 microplate reader (Biotek) and only samples with > 10 ng/μl concentration were  
305 used to generate tag-based RNA-seq libraries, following protocols modified for sequencing on  
306 the Illumina platform [https://github.com/ckenkel/tag-based\\_RNAseq](https://github.com/ckenkel/tag-based_RNAseq).

307  
308 Libraries from 2019 (n = 45 samples) were sequenced on the NextSeq 550 in 2020 by the USC  
309 Genome Core using a 1x75bp HO kit. Libraries from 2021 (n = 30 samples) were sequenced on  
310 the NextSeq 2000 in 2022 in two replicate separate runs by the USC Norris Comprehensive  
311 Cancer Center Molecular Genomics core using a NextSeq 2000 P2 Reagents v3 kit, after which  
312 reads were concatenated to reach a comparable sequencing depth. The average sequencing  
313 depth per sample for the two libraries was 5.9 M reads ( $\pm 0.2$  M) and 5.4 M reads ( $\pm 0.3$  M) for  
314 the 2019 and 2021 datasets, respectively.

315

#### 316 Bioinformatics pipelines

317 Downstream bioinformatic processing was performed on USC's Center for Advanced Research  
318 Computing (CARC) following protocols described in [https://github.com/ckenkel/tag-](https://github.com/ckenkel/tag-based_RNAseq)  
319 [based\\_RNAseq](https://github.com/ckenkel/tag-based_RNAseq). Briefly, a custom perl script was used to discard PCR duplicates and reads  
320 missing adapter sequences. Poly-A tails and adapter sequences were trimmed and only high  
321 quality reads (PHRED score  $\geq 20$  over 90% of the read) were retained. A total of 2.7 M ( $\pm 0.09$   
322 M) and 2.4 M ( $\pm 0.1$  M) reads per sample remained for the 2019 and 2021 datasets respectively  
323 after quality filtering. Filtered reads were mapped to an adult *Orbicella faveolata* transcriptome  
324 (Supplemental Materials) using the gmapper command from SHRiMP2 (Rumble et al., 2009).  
325 Read counts were summed by isogroup using a custom perl script, resulting in a per sample  
326 mapped read average of 1.5 M ( $\pm 0.05$  M) and 1.3 M ( $\pm 0.07$  M), for the 2019 and 2021 datasets  
327 respectively.

328

#### 329 Statistical analysis of gene expression

330 Larval samples from the two years were first compiled, where isogroups shared between the  
331 two year cohorts that had fewer than 2 counts across 90% of the samples were discarded,  
332 resulting in a total of 28,675 high quality isogroups remaining. Counts were then transformed  
333 using the *rlog* function in DESeq2 (Love et al., 2014) and outlier samples were identified through  
334 a sample network with a standardized connectivity score of less than  $-2.5$ , based on which one  
335 sample from the 2019 dataset and one from the 2021 data set were filtered. The filtered dataset  
336 was then separated by year to form two subsets, on which principal component analysis (PCA)  
337 was applied to visualize global gene expression pattern for each larval cohort using the R  
338 package FactoMineR (Lê et al., 2008).

339

340 Gene co-expression analysis was conducted using the WGCNA package in R (Langfelder &  
341 Horvath, 2008) following the standard tutorial (Langfelder & Horvath 2016) and a pipeline for  
342 performing meta-analysis of two microarray datasets (Miller 2011). Briefly, a signed gene co-  
343 expression network was constructed with a soft power of 4. Module assignment was generated  
344 based on the 2019 dataset and imposed onto the 2021 dataset to assess how well those  
345 modules were preserved across datasets. The eigengenes of these shared modules were  
346 correlated with origin (levels for 2019: CR x CR, HR x HR, Hybrid; levels for 2021: HR x HR, CR  
347 x HR, HR x CR) and treatment (levels: control, heat).

348

349 DESeq2 (Love et al., 2014) was used to examine genes that were differentially expressed in  
350 larvae by origin and treatment, with each year's cohort being analyzed separately. Isogroups  
351 that had fewer than 2 counts across 90% of the samples were discarded, resulting in a total of  
352 27,894 high quality reads in the 2019 dataset and 28,960 reads in the 2021 dataset. A two-  
353 factor grouping was created by combining origin and treatment and fed into the DESeq2 model  
354 as the design, from which results were extracted with specific contrasts to obtain differentially  
355 expressed genes (DEGs) in response to treatment in a particular larval origin (e.g. CR x CR

356 heat vs. CR x CR control). Significance testing was determined using a Wald test after  
357 independent filtering using a false discovery rate-corrected (FDR) threshold of 0.1. Multiple test  
358 correction was applied to raw p-values following Benjamini & Hochberg (Benjamini & Hochberg,  
359 1995) and adjusted p-values less than 0.1 were considered significant. Signed log-p values  
360 were generated based on the adjusted p-values to serve as input for gene ontology (GO)  
361 enrichment analysis described below.

362

363 To explore the possibility that heat-responsive genes were front- or back-loaded in the CR x CR  
364 or HR x HR populations which would preclude their identification as significantly differentially  
365 expressed genes (Barshis et al., 2013), we identified the overlap between significantly up-  
366 regulated/down-regulated genes in response to heat in one population and the significantly up-  
367 regulated/down-regulated genes between groups in control conditions (i.e. constitutively  
368 differentially expressed) as candidate front-/back-loaded genes in the other population. For  
369 example, genes identified as significantly up-regulated in CR x CR larvae but not HR x HR  
370 larvae under heat that were also significantly up-regulated under control in HR x HR vs CR x CR  
371 larvae were identified as potentially front-loaded genes in HR x HR larvae. The same approach  
372 was repeated for determining back-loaded genes as well as front-loaded/back-loaded genes in  
373 CR x CR larvae.

374

375 To understand the functional implications of conserved gene modules identified in WGCNA, a  
376 categorical gene ontology (GO) enrichment analysis was performed using binary values (1 or 0)  
377 to indicate module membership in the WGCNA set followed by a Fisher's exact test and false  
378 discovery rate correction. For heat-responsive DEGs by larval origin, signed log p-values using  
379 adaptive clustering of GO categories and a two-sided Mann-Whitney U-test was applied,  
380 followed by a false discovery rate correction. GO scripts can be found at

381 [https://github.com/z0on/GO\\_MWU](https://github.com/z0on/GO_MWU). Heatmaps of hierarchically clustered GO terms were  
382 generated using the pheatmap package (Kolde, 2012) in R.  
383  
384 Discriminant analysis of principal components (DAPC) was performed to explore the relative  
385 changes in global expression between treatment in different populations from 2019 and 2021  
386 using the R package adegenet (Jombart, 2008). Variance stabilized data (VSD) were used to  
387 create the model and the number of PCs was chosen to capture at least 80% of transcriptional  
388 variance. Distribution of samples grouped by origin and treatment was visualized in density  
389 plots.

390

## 391 **Results**

392

### 393 Temperatures and bleaching history at study sites

394 SST was always cooler at HR than CR (Fig. 1) during the data collection period, although  
395 bleaching occurred at both sites in 2014 and 2015 (Gintert et al., 2018; Manzello et al., 2019).  
396 Bleaching was observed at CR in 2018 and during gamete collection in 2019 at CR, but not at  
397 HR. CR gametes were collected from colonies that didn't show visual bleaching. In 2021,  
398 bleaching was not observed at either site, in line with the cooler temperature patterns (Fig. 1). In  
399 total, from the start of the most recent mass global bleaching event in 2014 to the 2021 spawn,  
400 CR experienced four bleaching events, whereas HR only experienced two events. Notably, HR  
401 did not experience bleaching between 2015 and 2021.

402

### 403 Larval survival under acute heat stress

404 To achieve a reasonable separation of survivorship among the different groups, the 36 °C acute  
405 temperature stress lasted for 96 hrs in 2019 and 141 hrs in 2021. The average survival rate at  
406 the end of each year's experiment for the control vs. heat group was 77% vs. 47% and 86% vs.

407 33% respectively (Fig. 2). Exposure to 36 °C significantly increased larval mortality in both  
408 years, resulting in hazard ratios of 3.1 ( $z = 4.16$ ,  $p < 0.001$ ) and 28.7 ( $z = 4.11$ ,  $p < 0.001$ ) for  
409 heat-treated larvae from 2019 and 2021, respectively. Larval origin also had a significant effect  
410 on survival in both years. In 2019, the CR x CR cross experienced almost double the mortality  
411 risk (HR = 1.9,  $z = 2.18$ ,  $p < 0.05$ ) in comparison to the HR x HR cross, and in 2021 the CR x  
412 HR cross experienced more than 10 times the risk (HR = 11.8,  $z = 2.18$ ,  $p < 0.001$ ) of the HR x  
413 HR cross.

414

#### 415 Gamete (2019 and 2021) and larval ecophysiology (2021 only)

416 Total lipid content of gametes collected from CR and HR during 2019 spawning season did not  
417 differ between the two sites (Fig. 3b). However, HR gametes contained 2.2 times more wax  
418 esters ( $F = 6.27$ ,  $df = 1$ ,  $p < 0.05$ ) and 1.5 times more phospholipids ( $F = 6.07$ ,  $df = 1$ ,  $p < 0.05$ )  
419 than CR gametes (Fig. 3a). No differences in triacylglycerol content by origin were apparent.  
420 Qualitatively, lipid content tended to be higher in the CR gametes in 2021 (Fig. 3b), but as only  
421 one colony spawned, formal significance was not evaluated. No differences were detected in  
422 total lipid content, lipid classes, or total soluble protein content of 2021 larvae between origin,  
423 treatment conditions or their interaction (Fig. S2, S3; Table S2). Protein and lipid data were  
424 unavailable for 2019 larvae exposed to the 32 °C moderate stress.

425

#### 426 Major drivers of transcriptional variation

427 Principal component analysis (PCA) on all high expression genes (count > 2 in 90% samples)  
428 within each dataset showed that larval origin was an important driver of transcriptional variance  
429 in addition to temperature treatment (Fig. 4). Samples clustered by larval origin along PC2 in the  
430 2019 dataset, which accounted for 5.6% of the overall variance in expression (Fig. 4a). Putative  
431 hybrid samples generally clustered mid-way between HR x HR and CR x CR origin larvae. In  
432 the 2021 dataset, larval origin was the primary driver of expression variation, as cross types



433 were clustered along the first PC which accounted for 10.4% of the overall variance (Fig. 4b).  
434 No significant differences in clustering were apparent between the reciprocal hybrids (CR x HR  
435 vs. HR x CR) but both were distinct from the HR x HR origin larvae. Clustering by temperature  
436 treatment was apparent along PC2 in the 2021 dataset, which explained 9.6% of the variance in  
437 overall expression (Fig. 4b), and along PC3 in the 2019 dataset, which explained 5.1% of  
438 transcriptional variance (Fig. S4).

439

#### 440 Conservation of expression networks and their functional significance

441 WGCNA was used to investigate whether and to what degree expression patterns were  
442 conserved between the two datasets and to further explore their relationships with experimental  
443 factors. Four modules, pink (n = 400 genes), purple (n = 268), magenta (n = 283), and red (n =  
444 514), were highly correlated with origin in both years, although the directions of the correlations  
445 were not always conserved (Fig. 5). Specifically, genes within the pink and purple modules were  
446 strongly negatively correlated, or down-regulated, in 2019 CR x CR larvae (pink: Pearson's  $r = -$   
447  $0.87$ ,  $p_{cor} = 5e^{-15}$ ; purple: Pearson's  $r = -0.74$ ,  $p_{cor} = 8e^{-9}$ ) and up-regulated in 2019 HR x HR  
448 larvae (pink: Pearson's  $r = 0.81$ ,  $p_{cor} = 1e^{-11}$ ; purple: Pearson's  $r = 0.69$ ,  $p_{cor} = 1e^{-7}$ ), while the  
449 opposite relationship was observed in the magenta (CR x CR: Pearson's  $r = 0.71$ ,  $p_{cor} = 6e^{-8}$ ;  
450 HR x HR: Pearson's  $r = -0.86$ ,  $p_{cor} = 7e^{-14}$ ) and red modules (CR x CR: Pearson's  $r = 0.88$ ,  $p_{cor} =$   
451  $2e^{-15}$ ; HR x HR: Pearson's  $r = -0.76$ ,  $p_{cor} = 1e^{-9}$ ). In comparison, the magnitude and direction of  
452 module-trait correlations remained similar for the pink and red modules in 2021, with pink  
453 module genes again showing strong up-regulation in HR x HR larvae and red module genes  
454 showing strong down-regulation (pink: Pearson's  $r = 0.98$ ,  $p_{cor} = 3e^{-21}$ ; red: Pearson's  $r = -0.98$ ,  
455  $p_{cor} = 3e^{-21}$ ). While there were still highly significant correlations observed for the purple and  
456 magenta modules with respect to origin, the direction of the association was completely  
457 reversed, with strong down-regulation of genes in the purple module (Pearson's  $r = -0.98$ ,  $p_{cor} =$   
458  $9e^{-20}$ ) and up-regulation of genes in the magenta module (Pearson's  $r = 0.96$ ,  $p_{cor} = 5e^{-17}$ ).

459 Modules significantly associated with treatment exhibited more moderate correlation coefficients  
460 (Pearson's  $r$  range:  $\pm 0.4$  to  $\pm 0.6$ ), but their expression patterns were more strongly conserved  
461 across years. Genes in the black ( $n = 408$  genes), greenyellow ( $n = 268$ ), salmon ( $n = 160$ ), and  
462 yellow ( $n = 574$ ) modules were consistently up-regulated in heat-treated larvae whereas genes  
463 in the cyan ( $n = 152$ ) module were consistently down-regulated in heat-treated larvae across  
464 years.

465

466 Categorical functional enrichment analysis of genes assigned to the significant origin modules  
467 (pink, purple, red, magenta) revealed few significant GO terms, likely due to small module size.

468 Two terms in the molecular function category (GO:0031683, G-protein beta/gamma-subunit  
469 complex binding; GO:0050780, dopamine receptor binding) and one term in the cellular  
470 components category (GO:0005834; GO:1905360, GTPase complex) were significantly  
471 enriched ( $p \leq 0.05$ ) among genes in the pink module (Table S3). GO analysis of treatment  
472 modules identified enrichment of genes associated with heat response pathways, such as  
473 immune response, defense response, and response to external stimulus in the black module  
474 which was up-regulated in response to heat treatment ( $p < 0.01$ , Fig. S5, Table S3). Whereas  
475 the cyan module, which was down-regulated in response to heat, showed enrichment of genes  
476 associated with amide and peptide metabolic and biosynthetic processes ( $p < 0.05$ , Fig. S6,  
477 Table S3). These processes were also enriched among genes in the salmon module, which was  
478 up-regulated under heat (Table S3). One term in the molecular function category (GO:0031210;  
479 GO:0050997, phosphatidylcholine binding) was significantly enriched ( $p = 0.05$ ) among genes in  
480 the yellow module, and was also up-regulated under heat treatment (Table S3). No significant  
481 functional enrichments were detected for the greenyellow module.

482

483 Origin-specific responses to thermal stress

484 DESeq2 analysis of the 2019 dataset showed that a total of 561 genes were up-regulated and  
485 436 were down-regulated in heat-treated larvae relative to controls (Table S4). When further  
486 partitioned by origin, 133 heat-responsive genes were up-regulated and 144 were down-  
487 regulated in 2019 CR x CR larvae, whereas 376 were up-regulated and 158 were down-  
488 regulated in 2019 HR x HR larvae. The putative hybrid larvae up-regulated 12 genes and down-  
489 regulated 9 genes under heat and thus were excluded from the downstream functional  
490 enrichment analysis due to a limited number of differentially expressed genes (DEGs). Among  
491 these origin-specific heat-responsive genes, 28 (11 annotated) were front-loaded and 47 (31)  
492 were back-loaded in 2019 HR x HR larvae, while 82 (48) were front-loaded and 23 (14) were  
493 back-loaded in 2019 CR x CR larvae (Table S5). In the 2021 dataset, 706 heat-responsive  
494 genes were up-regulated and 953 were down-regulated in HR x HR larvae, 228 were up-  
495 regulated and 54 were down-regulated in CR x HR larvae, and 124 were up-regulated and 101  
496 were down-regulated in HR x CR larvae.

497

498 Subsequent ontology analysis of these DEGs showed that biological processes including  
499 immune response, peptide hormone processing, defense response, and response to stimulus  
500 were enriched among heat-responsive up-regulated genes in 2019 CR x CR larvae (FDR <  
501 0.01), while RNA metabolic process and macromolecule biosynthetic process were enriched  
502 among down-regulated genes (FDR < 0.01, Fig. 6a, Table S6). In the 2019 HR x HR larvae,  
503 phospholipid catabolic process was enriched among genes up-regulated in heat (FDR < 0.05),  
504 while microtubule-based movement/process and protein-DNA complex subunit organization  
505 were enriched among downregulated genes (FDR < 0.01, Fig. 6b, Table S7). Discriminant  
506 analysis of principal components (DAPC) for heat responsive genes revealed a greater  
507 transcriptional response in 2019 HR x HR larvae compared to the CR x CR larvae from the  
508 same year (Fig. 6c).

509

510 In the 2021 cohort, genes up-regulated in response to heat in HR x HR larvae were enriched for  
511 biological processes including DNA metabolic process, organelle localization, and cellular  
512 response to DNA damage stimulus (FDR < 0.01, Fig. S8, Table S8). Processes enriched among  
513 down-regulated genes included a suite of metabolic processes of small and large molecules,  
514 such as organic acids, fatty acids, and lipids (FDR < 0.01). For the two hybrid crosses,  
515 upregulated genes were enriched for NF- $\kappa$ B signaling regulation, immune and defense  
516 response, as well as regulation of cell death (FDR < 0.05, Fig. S9, S10, Table S9, S10).  
517 Downregulated genes were enriched for lipids and protein metabolic/catabolic processes (FDR  
518 < 0.05). DAPC for heat responsive genes identified a greater response in HR x CR larvae  
519 compared to the HR x HR and CR x HR larvae from the same year (Fig. S11).

520

## 521 **Discussion**

522 Adult *O. faveolata* from Cheeca Rocks exhibit elevated thermal tolerance in response to natural  
523 bleaching events (Gintert et al., 2018; Manzello et al., 2019) suggesting that they have  
524 acclimatized or adapted to naturally higher and more variable temperatures characteristic of  
525 inshore reef sites in the Florida Keys (Kenkel et al., 2015; Kenkel & Matz, 2016). Contrary to the  
526 current paradigm of inherited and/or enhanced thermal tolerance in adults experiencing more  
527 extreme thermal regimes (Dixon et al., 2015; Putnam & Gates, 2015; Strader & Quigley, 2022),  
528 we found that offspring of these more tolerant inshore colonies were more susceptible to  
529 thermal stress, exhibiting reduced survival and stronger expression signatures of a stress  
530 response in comparison to larvae from offshore colonies (Fig. 2, 6). The observed total lipid data  
531 suggest robust bleaching resistance in adults may come at the cost of reproductive investment  
532 (Fig. 3), although patterns are inconsistent across years. These findings represent an important  
533 counter-example to the rationale underpinning selective breeding approaches (Drury et al.,  
534 2022): that tolerant parents can be counted on to produce tolerant offspring.

535

536 Impaired larval performance may result from reduced reproductive investment

537 Reef origin (or cross type) and temperature treatment played important roles in driving  
538 physiological traits in *O. faveolata* larvae. As expected, larvae were more likely to die under heat  
539 treatment than in the ambient control (Fig. 2), but the origin response was unexpected.  
540 Horseshoe Reef (HR) purebred larvae appeared to be the best performers in both years, while  
541 Cheeca Rocks (CR) purebred larvae in 2019 and 2021 CR x HR hybrids experienced  
542 significantly higher mortality in comparison (Fig. 2). Previous studies conducted on *Acropora*  
543 *millepora* and *Acropora tenuis* from the Great Barrier Reef showed that larval survival under a  
544 similar level of acute thermal stress (35.5 °C) was enhanced in offspring of parents from warmer  
545 source reefs (Dixon et al., 2015; Strader & Quigley, 2022). Yet, in our study system, the HR x  
546 HR cross, produced by the less tolerant parents sourced from a cooler reef environment,  
547 repeatedly outperformed the CR cross produced by more tolerant parents from a warmer reef  
548 environment (Gintert et al., 2018; Manzello et al., 2019). This suggests that the host genetic  
549 contribution to thermal tolerance may be minimal or overpowered by other factors such as  
550 recent and concurrent heat stress, or maternal provisioning.

551  
552 Prior thermal stress and bleaching has been linked to negative reproductive outcomes, including  
553 both fecundity and gamete quality, in multiple coral species (Jones & Berkelmans, 2011;  
554 Szmant & Gassman, 1990; Ward et al., 2002). Although the severity of reproductive impacts is  
555 thought to be related to the severity of bleaching and rate of recovery, resistant/resilient colonies  
556 do not necessarily exhibit latent effects (Leinbach et al., 2021; Szmant, 1991). Notably, the HR  
557 source population suffered from both a reduced number of spawning colonies and total gametes  
558 released as a result of the back-to-back bleaching events in 2014 and 2015 (Fisch et al., 2019).  
559 Previous research consistently demonstrates that adult colonies from nearshore reef  
560 environments display higher resistance and resilience to thermal stress compared to those from  
561 offshore reefs (Gintert et al., 2018; Manzello et al., 2019). Based on these findings, we

562 anticipated that the offspring of these resilient adults would also exhibit enhanced thermal  
563 tolerance, in line with previous studies. At the time of spawning collections in 2019, temperature  
564 at CR had surpassed the local bleaching threshold and a majority of the colonies showed some  
565 degree of paling (i.e., onset of bleaching), while HR experienced cooler temperatures and all the  
566 colonies appeared fully pigmented (Fig. 1). Recently, (Leinbach et al., 2021) showed that  
567 *Acropora hyacinthus* which resisted bleaching maintained higher reproductive capacity than  
568 recovered coral. Although we only collected gametes from CR colonies without apparent signs  
569 of physiological stress in 2019 (i.e. thermally resistant adults), it is likely that the energetic state  
570 of individual colonies was already compromised due to the heat stress, which may have  
571 impacted maternal provisioning.

572

573 Scleractinian coral gametes are largely composed of lipids with wax esters, phospholipids and  
574 triacylglycerols being the most abundant classes (Figueiredo et al., 2012). Mean total lipids  
575 were higher for 2019 HR gametes compared to CR gametes (Fig. 3b). Lipid class analyses, of  
576 the 2019 gametes, showed CR gametes contained less wax esters and phospholipids than HR  
577 gametes (Fig. 3a). Wax esters take longer to metabolize, supporting their role in long-term  
578 energy storage, and are important for larval development (Lee et al., 2006; Richmond, 1987;  
579 Rivest et al., 2017), indicating 2019 HR gametes had greater energy reserves available for  
580 dispersal and settlement. Additionally, greater wax ester stores lower gamete/larval density,  
581 possibly contributing to extended dispersal (Richmond, 1987). Phospholipids were significantly  
582 different across sites in 2019, but this lipid class encompasses many structural lipid compounds,  
583 thus muddling the implications. While triacylglycerols can be rapidly hydrolyzed and likely  
584 support immediate energetic needs (Figueiredo et al., 2012; Sewell, 2005), no significant  
585 differences were detected across sites in either 2019 or 2021. Similar lipid class patterns were  
586 not observed in the 2021 cohort, possibly due to lack of replication in CR gametes (Fig. 3a). The  
587 general deficiency of 2019 CR gametes in all these classes suggests that bleaching tolerance

588 and resilience of CR adults may come at the cost of reproductive investment, potentially  
589 contributing to reduced performance of CR larvae.

590

591 Further supporting a compromised reproductive output of nearshore coral populations was the  
592 absence of mass spawning on CR in the summer of 2021, despite no observed bleaching (Fig.  
593 1), which limited our ability to re-assess performance of CR x CR larvae and additional hybrid  
594 crosses. This implies that reproductive capacity of CR adults (likely among other marginal  
595 nearshore populations) could be jeopardized by the persistent latent effects of accumulated  
596 stress. As thermal anomalies increase in magnitude and frequency in the Florida Reef Tract  
597 (Manzello, 2015), it is important to consider any latent effects beyond visible stress responses  
598 that could affect the next generation and ultimately the persistence of reef communities.

599

600 Stress tolerance rather than a front-loaded stress response is associated with enhanced larval  
601 survival

602 In addition to origin-specific physiological differences, larvae originating from different reef sites  
603 mounted different transcriptional responses after four days of 32 °C heat challenge. In the 2019  
604 CR purebred larvae, we observed functional enrichment in a wide range of stress responses  
605 (e.g., immunity, defense, inflammation) among the significantly upregulated genes, whereas  
606 metabolic and biosynthetic processes (e.g., various RNA molecules, peptide, cellular nitrogen  
607 compounds) were enriched among downregulated genes (Fig. 6a). Similarly, underperforming  
608 CR x HR larvae in 2021 showed pronounced upregulation of defense and immune response  
609 pathways and downregulation of metabolic processes (Fig. S9). Upregulation of stress response  
610 genes and concomitant downregulation of growth related processes, such as rRNA metabolism,  
611 is a hallmark of the environmental stress response (López-Maury et al., 2008). In contrast, fewer  
612 enriched GO categories were identified among the heat-responsive DEGs in the 2019 and 2021  
613 HR purebred crosses (Fig. 6b, S7), and more interestingly, the enrichments did not highlight

614 stress response pathways like their CR x CR (2019) or hybrid (2021) counterparts, but cellular  
615 homeostatic processes instead (Fig. 6b).

616

617 The lack of an apparent stress response in HR purebreds does not appear to be due to an  
618 inability to detect differential expression as a result of transcriptional front-loading, or higher  
619 baselines expression of stress response genes (Barshis et al., 2013) We tested for front-loading  
620 and found that comparatively fewer genes were front-loaded in HR x HR larvae and none of  
621 those were annotated as stress response genes (Table S5). Among the annotated genes that  
622 were front-loaded in CR x CR larvae, two were related to protein ubiquitination (Ube2g1 and  
623 ZNF598, Table S4), which may indicate constitutive expression of stress response pathways.  
624 Additionally, HR purebreds had a more robust expression response to thermal stress, exhibiting  
625 lower baseline expression, but achieving the same magnitude of overall transcriptional plasticity  
626 in response to thermal stress as 2019 CR x CR larvae (Fig. 6c). In 2021 HR x HR and CR x HR  
627 larvae showed similarly elevated levels of baseline expression in comparison to HR x CR hybrid  
628 (Fig. S11). Taken together, this suggests the 2019 HR x HR larvae may be more resistant to  
629 thermal stress not because they were pre-conditioned for stressful conditions, but because they  
630 were able to strongly and rapidly acclimate their physiology, possibly as a result of having more  
631 energy reserves to devote towards a stress response (Fig. 3). Such a robust response may also  
632 be followed by a rapid return to baseline expression, or transcriptomic resilience (Rivera et al.,  
633 2021), when stress abates, although additional time-course data are needed to test this  
634 hypothesis.

635

### 636 Conserved transcriptomic signatures of population origin and response to treatment

637 In addition to survival and gamete lipid content, global gene expression profiles of aposymbiotic  
638 *O. faveolata* larvae also revealed a strong signature of reef origin. The 2019 samples were  
639 organized into 3 distinct clusters based on origin along PC2, while origin was the predominant



640 driver of clustering in the 2021 samples (Fig. 4). Treatment appeared to be a weaker driver in  
641 both datasets, clustering samples along PC3 in 2019 and PC2 in 2021 (Fig. S4, 4b). Despite a  
642 difference in developmental age of the two larval cohorts at the time of sampling (7 vs. 9 days  
643 post fertilization for 2019 vs. 2021), a WGCNA meta-analysis identified highly conserved gene  
644 modules significantly correlated with larval origin although the magnitude and direction of  
645 expression patterns was not always conserved (Fig. 5). Corals exhibit waves of transcription  
646 during early development consistent with zygotic genome activation and degradation of  
647 maternal transcripts (Chille et al., 2021; Hayward et al., 2011). Differences in the magnitude and  
648 direction of select modules between the 2019 and 2021 datasets (purple and magenta, Fig. 5)  
649 may reflect these temporal transcriptional waves, although a more thorough time course is  
650 needed to test this hypothesis. Nevertheless, evidence of such strong module preservation  
651 implies the existence of a core group of origin-specific genes that have a lasting effect  
652 throughout the organisms' development and these modules may be linked to baseline  
653 differences in larval physiology. However, little information on the functional implications of  
654 these gene sets was retrieved from the GO enrichment analysis, which may be attributable to  
655 small module size and/or an insufficient number of annotated genes. This could be a worthwhile  
656 investigation for future studies as annotations improve and better enrichment methods become  
657 available.

658  
659 WGCNA meta-analysis also identified highly conserved gene modules that were significantly  
660 associated with temperature treatment. Similar to the origin-specific modules, the majority of  
661 these treatment modules lacked significant functional enrichment. For the two modules that did  
662 have sufficient enrichment, biological processes including immune response, defense response,  
663 and response to external stimulus were enriched in genes associated with the black module,  
664 which were up-regulated in heat (Fig. S5), while amide and peptide metabolic and biosynthetic  
665 processes were enriched in genes associated with the cyan module that were downregulated in

666 heat (Fig. S6). Therefore, upregulation of genes involved in stress response pathways and  
667 downregulation of metabolic processes related to growth and development in heat-treated  
668 larvae aligns with the cellular stress and cellular homeostasis response profiles identified in  
669 corals (and other marine and terrestrial organisms) during short- to medium-term physiological  
670 stress (Kenkel et al., 2014; Kültz, 2005).

671

#### 672 Implications for adaptive management

673 The documented resilience of adult corals to recurrent heat stress and bleaching in  
674 environments with high and variable temperatures may come with highly consequential trade-  
675 offs. In this study, we show that larvae from a site that routinely experiences and recovers from  
676 heat-induced bleaching, significantly underperformed relative to larvae from a cooler, less  
677 variable reef site. The unexpected outcome that more thermally tolerant *O. faveolata* produced  
678 poorer quality offspring challenges the prevailing paradigm that breeding vulnerable populations  
679 with thermally tolerant individuals can contribute to genetic rescue (Bay et al., 2017), which also  
680 serves as the theoretical justification for selective breeding approaches (Drury et al., 2022).  
681 Moreover, natural adaptive capacity is likely already impaired as CR x CR larvae and CR x HR  
682 hybrids exhibited greater mortality risk even under ambient conditions (Fig. 2). These findings  
683 also align with the long-term pattern of recruitment failure in Caribbean coral (Hughes & Tanner,  
684 2000; Williams et al., 2008)

685

#### 686 **Data availability**

687 Raw sequence data can be found under NCBI BioProject PRJNA981197. Scripts and input files  
688 are available at DOI: 10.5281/zenodo.8025715.

689

#### 690 **Acknowledgements**

691 This project was supported by the NOAA OAR 'Omics Program through an award to D.  
692 Manzello/I. Enochs and start-up funds from the University of Southern California to C. Kenkel.  
693 We thank A. Mayfield for his field support with the 2019 experiments. We thank the Baker Lab  
694 and the Traylor-Knowles Lab at the University of Miami RSMAS for their technical support with  
695 the 2021 experiments.

696  
697  
698  
699  
700  
701  
702  
703  
704  
705  
706  
707  
708  
709  
710  
711  
712  
713  
714  
715  
716  
717  
718  
719  
720  
721  
722  
723  
724  
725  
726  
727  
728  
729  
730

731 **References**

- 732 Ainsworth, T. D., Heron, S. F., Ortiz, J. C., Mumby, P. J., Grech, A., Ogawa, D., Eakin, C. M., &  
733 Leggat, W. (2016). Climate change disables coral bleaching protection on the Great Barrier  
734 Reef. *Science*, 352(6283), 338–342.
- 735 Aitken, S. N., & Whitlock, M. C. (2013). *Assisted Gene Flow to Facilitate Local Adaptation to Climate*  
736 *Change*. <https://doi.org/10.1146/annurev-ecolsys-110512-135747>
- 737 Baker, A. C., Glynn, P. W., & Riegl, B. (2008). Climate change and coral reef bleaching: An  
738 ecological assessment of long-term impacts, recovery trends and future outlook. *Estuarine,*  
739 *Coastal and Shelf Science*, 80(4), 435–471.
- 740 Barshis, D. J., Ladner, J. T., Oliver, T. A., Seneca, F. O., Traylor-Knowles, N., & Palumbi, S. R.  
741 (2013). Genomic basis for coral resilience to climate change. *Proceedings of the National*  
742 *Academy of Sciences*, 110(4), 1387–1392.
- 743 Bay, R. A., Rose, N. H., Logan, C. A., & Palumbi, S. R. (2017). Genomic models predict successful  
744 coral adaptation if future ocean warming rates are reduced. *Science Advances*, 3(11),  
745 e1701413.
- 746 Benjamini, Y., & Hochberg, Y. (1995). Controlling the false discovery rate: A practical and powerful  
747 approach to multiple testing. *Journal of the Royal Statistical Society*, 57(1), 289–300.
- 748 Berkelmans, R., & van Oppen, M. J. H. (2006). The role of zooxanthellae in the thermal tolerance of  
749 corals: a “nugget of hope” for coral reefs in an era of climate change. *Proceedings. Biological*  
750 *Sciences / The Royal Society*, 273(1599), 2305–2312.
- 751 Chille, E., Strand, E., Neder, M., Schmidt, V., Sherman, M., Mass, T., & Putnam, H. (2021).  
752 Developmental series of gene expression clarifies maternal mRNA provisioning and maternal-  
753 to-zygotic transition in a reef-building coral. *BMC Genomics*, 22(1), 815.
- 754 Coffroth, M. A., Santos, S. R., & Goulet, T. L. (2001). Early ontogenetic expression of specificity in a  
755 cnidarian-algal symbiosis. *Marine Ecology Progress Series*, 222, 85–96.
- 756 Conlan, J. A., Humphrey, C. A., Severati, A., & Francis, D. S. (2017). Influence of different feeding  
757 regimes on the survival, growth, and biochemical composition of *Acropora* coral recruits. *PLoS*

- 758        *One*, 12(11), e0188568.
- 759        Conlan, J. A., Jones, P. L., Turchini, G. M., Hall, M. R., & Francis, D. S. (2014). Changes in the  
760        nutritional composition of captive early-mid stage *Panulirus ornatus* phyllosoma over ecdysis  
761        and larval development. *Aquaculture*, 434, 159–170.
- 762        Dixon, G. B., Davies, S. W., Aglyamova, G. V., Meyer, E., Bay, L. K., & Matz, M. V. (2015). Genomic  
763        determinants of coral heat tolerance across latitudes. *Science*, 348(6242), 1460–1462.
- 764        Drury, C., Caruso, C., & Quigley, K. (2022). Selective Breeding to Enhance the Adaptive Potential of  
765        Corals. In M. J. H. van Oppen & M. Aranda Lastra (Eds.), *Coral Reef Conservation and*  
766        *Restoration in the Omics Age* (pp. 71–84). Springer International Publishing.
- 767        Dustan, P., & Halas, J. C. (1987). Changes in the reef-coral community of Carysfort reef, Key Largo,  
768        Florida: 1974 to 1982. *Coral Reefs*, 6(2), 91–106.
- 769        Eakin, C. M., Sweatman, H. P. A., & Brainard, R. E. (2019). The 2014–2017 global-scale coral  
770        bleaching event: insights and impacts. *Coral Reefs*, 38(4), 539–545.
- 771        Edmunds, P. J. (2015). A quarter-century demographic analysis of the Caribbean coral, *Orbicella*  
772        *annularis*, and projections of population size over the next century. *Limnology and*  
773        *Oceanography*, 60(3), 840–855.
- 774        Enochs, I. C., Manzello, D. P., Jones, P. J., Aguilar, C., Cohen, K., Valentino, L., Schopmeyer, S.,  
775        Kolodziej, G., Jankulak, M., & Lirman, D. (2018). The influence of diel carbonate chemistry  
776        fluctuations on the calcification rate of *Acropora cervicornis* under present day and future  
777        acidification conditions. *Journal of Experimental Marine Biology and Ecology*, 506, 135–143.
- 778        Figueiredo, J., Baird, A. H., Cohen, M. F., Flot, J.-F., Kamiki, T., Meziane, T., Tsuchiya, M., &  
779        Yamasaki, H. (2012). Ontogenetic change in the lipid and fatty acid composition of scleractinian  
780        coral larvae. *Coral Reefs*, 31(2), 613–619.
- 781        Fisch, J., Drury, C., Towle, E. K., Winter, R. N., & Miller, M. W. (2019). Physiological and  
782        reproductive repercussions of consecutive summer bleaching events of the threatened  
783        Caribbean coral *Orbicella faveolata*. *Coral Reefs*, 38, 863–876.
- 784        Folch, J., Lees, M., & Sloane Stanley, G. H. (1957). A simple method for the isolation and

- 785 purification of total lipides from animal tissues. *The Journal of Biological Chemistry*, 226(1),  
786 497–509.
- 787 Gardner, T. A., Côté, I. M., Gill, J. A., Grant, A., & Watkinson, A. R. (2003). Long-term region-wide  
788 declines in Caribbean corals. *Science*, 301(5635), 958–960.
- 789 Gintert, B. E., Manzello, D. P., Enochs, I. C., Kolodziej, G., Carlton, R., Gleason, A. C. R., & Gracias,  
790 N. (2018). Marked annual coral bleaching resilience of an inshore patch reef in the Florida Keys:  
791 A nugget of hope, aberrance, or last man standing? *Coral Reefs*, 37(2), 533–547.
- 792 Gladfelter, E. H., Monahan, R. K., & Gladfelter, W. B. (1978). Growth Rates of Five Reef-Building  
793 Corals in the Northeastern Caribbean. *Bulletin of Marine Science*, 28(4), 728–734.
- 794 Hayward, D. C., Hetherington, S., Behm, C. A., Grasso, L. C., Forêt, S., Miller, D. J., & Ball, E. E.  
795 (2011). Differential gene expression at coral settlement and metamorphosis--a subtractive  
796 hybridization study. *PloS One*, 6(10), e26411.
- 797 Hoegh-Guldberg, O., Jacob, D., Taylor, M., Guillén Bolaños, T., Bindi, M., Brown, S., Camilloni, I. A.,  
798 Diedhiou, A., Djalante, R., Ebi, K., Engelbrecht, F., Guiot, J., Hijjoka, Y., Mehrotra, S., Hope, C.  
799 W., Payne, A. J., Pörtner, H.-O., Seneviratne, S. I., Thomas, A., ... Zhou, G. (2019). The human  
800 imperative of stabilizing global climate change at 1.5°C. *Science*, 365(6459).  
801 <https://doi.org/10.1126/science.aaw6974>
- 802 Hoegh-Guldberg, O., Mumby, P. J., Hooten, A. J., Steneck, R. S., Greenfield, P., Gomez, E.,  
803 Harvell, C. D., Sale, P. F., Edwards, A. J., Caldeira, K., Knowlton, N., Eakin, C. M., Iglesias-  
804 Prieto, R., Muthiga, N., Bradbury, R. H., Dubi, A., & Hatziolos, M. E. (2007). Coral reefs under  
805 rapid climate change and ocean acidification. *Science*, 318(5857), 1737–1742.
- 806 Howells, E. J., Abrego, D., Liew, Y. J., Burt, J. A., Meyer, E., & Aranda, M. (2021). Enhancing the  
807 heat tolerance of reef-building corals to future warming. *Science Advances*, 7(34).  
808 <https://doi.org/10.1126/sciadv.abg6070>
- 809 Howells, E. J., Abrego, D., Meyer, E., Kirk, N. L., & Burt, J. A. (2016). Host adaptation and  
810 unexpected symbiont partners enable reef-building corals to tolerate extreme temperatures. In  
811 *Global Change Biology* (Vol. 22, Issue 8, pp. 2702–2714). <https://doi.org/10.1111/gcb.13250>

- 812 Hughes, T. P., & Tanner, J. E. (2000). Recruitment failure, life histories, and long-term decline of  
813 Caribbean corals. *Ecology*, *81*(8), 2250–2263.
- 814 Jombart, T. (2008). adegenet: a R package for the multivariate analysis of genetic markers.  
815 *Bioinformatics*, *24*(11), 1403–1405.
- 816 Jones, A. M., & Berkelmans, R. (2011). Tradeoffs to thermal acclimation: Energetics and  
817 reproduction of a reef coral with heat Tolerant Symbiodinium Type-D. *Journal of Marine Biology*,  
818 *2011*, 1–12.
- 819 Keister, E. F., Gantt, S. E., Reich, H. G., Turnham, K. E., Bateman, T. G., LaJeunesse, T. C.,  
820 Warner, M. E., & Kemp, D. W. (2023). Similarities in biomass and energy reserves among coral  
821 colonies from contrasting reef environments. *Scientific Reports*, *13*(1), 1355.
- 822 Kenkel, C. D., Almanza, A. T., & Matz, M. V. (2015). Fine-scale environmental specialization of reef-  
823 building corals might be limiting reef recovery in the Florida Keys. *Ecology*, *96*(12), 3197–3212.
- 824 Kenkel, C. D., Goodbody-Gringley, G., Caillaud, D., Davies, S. W., Bartels, E., & Matz, M. V. (2013).  
825 Evidence for a host role in thermotolerance divergence between populations of the mustard hill  
826 coral (*Porites astreoides*) from different reef environments. *Molecular Ecology*, *22*(16), 4335–  
827 4348.
- 828 Kenkel, C. D., & Matz, M. V. (2016). Gene expression plasticity as a mechanism of coral adaptation  
829 to a variable environment. *Nature Ecology & Evolution*, *1*(1), 14.
- 830 Kenkel, C. D., Sheridan, C., Leal, M. C., Bhagooli, R., Castillo, K. D., Kurata, N., McGinty, E.,  
831 Goulet, T. L., & Matz, M. V. (2014). Diagnostic gene expression biomarkers of coral thermal  
832 stress. *Molecular Ecology Resources*, *14*(4), 667–678.
- 833 Kolde, R. (2012). Pheatmap: pretty heatmaps. *R Package Version*.
- 834 Kültz, D. (2005). Molecular and evolutionary basis of the cellular stress response. *Annual Review of*  
835 *Physiology*, *67*, 225–257.
- 836 Ladd, M. C., Shantz, A. A., Bartels, E., & Burkepile, D. E. (2017). Thermal stress reveals a  
837 genotype-specific tradeoff between growth and tissue loss in restored *Acropora cervicornis*.  
838 *Marine Ecology Progress Series*, *572*, 129–139.

- 839 Langfelder, P., & Horvath, S. (2008). WGCNA: an R package for weighted correlation network  
840 analysis. *BMC Bioinformatics*, 9, 559.
- 841 Langfelder, P. & Horvath, S. (2016). Tutorials for the WGCNA Package. UCLA.  
842 <https://horvath.genetics.ucla.edu/html/CoexpressionNetwork/Rpackages/WGCNA/Tutorials/>
- 843 Lee, R. F., Hagen, W., & Kattner, G. (2006). Lipid storage in marine zooplankton. *Marine Ecology*  
844 *Progress Series*, 307, 273–306.
- 845 Leinbach, S. E., Speare, K. E., Rossin, A. M., Holstein, D. M., & Strader, M. E. (2021). Energetic and  
846 reproductive costs of coral recovery in divergent bleaching responses. *Scientific Reports*, 11(1),  
847 23546.
- 848 Lê, S., Josse, J., & Husson, F. (2008). FactoMineR: An R Package for Multivariate Analysis. *Journal*  
849 *of Statistical Software*, 25, 1–18.
- 850 Lesser, M. P. (2011). Coral Bleaching: Causes and Mechanisms. In Z. Dubinsky & N. Stambler  
851 (Eds.), *Coral Reefs: An Ecosystem in Transition* (pp. 405–419). Springer Netherlands.
- 852 Liu, G., Strong, A. E., Skirving, W., & Arzayus, L. F. (2005). *Overview of NOAA coral reef watch*  
853 *program's near-real time satellite global coral bleaching monitoring activities*. 1, 1783–1793.
- 854 López-Maury, L., Marguerat, S., & Bähler, J. (2008). Tuning gene expression to changing  
855 environments: from rapid responses to evolutionary adaptation. *Nature Reviews. Genetics*, 9(8),  
856 583–593.
- 857 Love, M. I., Huber, W., & Anders, S. (2014). Moderated estimation of fold change and dispersion for  
858 RNA-seq data with DESeq2. *Genome Biology*, 15(12), 550.
- 859 Manzello, D. P. (2015). Rapid Recent Warming of Coral Reefs in the Florida Keys. *Scientific*  
860 *Reports*, 5, 16762.
- 861 Manzello, D. P., Berkelmans, R., & Hendee, J. C. (2007). Coral bleaching indices and thresholds for  
862 the Florida Reef Tract, Bahamas, and St. Croix, US Virgin Islands. *Marine Pollution Bulletin*,  
863 54(12), 1923–1931.
- 864 Manzello, D. P., Enochs, I. C., Kolodziej, G., & Carlton, R. (2015a). Recent decade of growth and  
865 calcification of *Orbicella faveolata* in the Florida Keys: an inshore-offshore comparison. *Marine*



- 866 *Ecology Progress Series*, 521, 81–89.
- 867 Manzello, D. P., Enochs, I. C., Kolodziej, G., & Carlton, R. (2015b). Coral growth patterns of  
868 *Montastraea cavernosa* and *Porites astreoides* in the Florida Keys: The importance of thermal  
869 stress and inimical waters. *Journal of Experimental Marine Biology and Ecology*, 471, 198–207.
- 870 Manzello, D. P., Matz, M. V., Enochs, I. C., Valentino, L., Carlton, R. D., Kolodziej, G., Serrano, X.,  
871 Towle, E. K., & Jankulak, M. (2019). Role of host genetics and heat-tolerant algal symbionts in  
872 sustaining populations of the endangered coral *Orbicella faveolata* in the Florida Keys with  
873 ocean warming. *Global Change Biology*, 25(3), 1016–1031.
- 874 Marhaver, K., Chamberland, V., Fogarty, N. (2017). Coral Spawning Research & Larval Propagation.  
875 Reef Resilience Network. [https://reefresilience.org/caribbean-coral-restoration-coral-spawning-](https://reefresilience.org/caribbean-coral-restoration-coral-spawning-research-larval-propagation/)  
876 [research-larval-propagation/](https://reefresilience.org/caribbean-coral-restoration-coral-spawning-research-larval-propagation/)
- 877 Miller, J. (2011). Meta-analyses of data from two (or more) microarray data sets. UCLA.  
878 <https://horvath.genetics.ucla.edu/html/CoexpressionNetwork/JMiller/>
- 879 Nichols, P. D., Mooney, B. D., & Elliott, N. G. (2001). Unusually high levels of non-saponifiable lipids  
880 in the fishes escolar and rudderfish identification by gas and thin-layer chromatography. *Journal*  
881 *of Chromatography. A*, 936(1-2), 183–191.
- 882 Palumbi, S. R., Barshis, D. J., Traylor-Knowles, N., & Bay, R. A. (2014). Mechanisms of reef coral  
883 resistance to future climate change. *Science*, 344(6186), 895–898.
- 884 Precht, W. F., & Miller, S. L. (2007). Ecological Shifts along the Florida Reef Tract: The Past as a  
885 Key to the Future. In R. B. Aronson (Ed.), *Geological Approaches to Coral Reef Ecology* (pp.  
886 237–312). Springer New York.
- 887 Putnam, H. M., & Gates, R. D. (2015). Preconditioning in the reef-building coral *Pocillopora*  
888 *damicornis* and the potential for trans-generational acclimatization in coral larvae under future  
889 climate change conditions. *The Journal of Experimental Biology*, 218(Pt 15), 2365–2372.
- 890 Quigley, K. M., Bay, L. K., & van Oppen, M. J. H. (2020). Genome-wide SNP analysis reveals an  
891 increase in adaptive genetic variation through selective breeding of coral. *Molecular Ecology*,  
892 29(12), 2176–2188.

- 893 R Core Team (2022). R: A language and environment for statistical computing. R Foundation for  
894 Statistical Computing, Vienna, Austria. URL <https://www.R-project.org/>.
- 895 Richmond, R. H. (1987). Energetics, competency, and long-distance dispersal of planula larvae of  
896 the coral *Pocillopora damicornis*. *Marine Biology*, 93(4), 527–533.
- 897 Rippe, J. P., Matz, M. V., Green, E. A., Medina, M., Khawaja, N. Z., Pongwarin, T., Pinzón C., J. H.,  
898 Castillo, K. D., & Davies, S. W. (2017). Population structure and connectivity of the mountainous  
899 star coral, *Orbicella faveolata*, throughout the wider Caribbean region. In *Ecology and Evolution*  
900 (Vol. 7, Issue 22, pp. 9234–9246). <https://doi.org/10.1002/ece3.3448>
- 901 Rivera, H. E., Aichelman, H. E., Fifer, J. E., Kriefall, N. G., Wuitchik, D. M., Wuitchik, S. J. S., &  
902 Davies, S. W. (2021). A framework for understanding gene expression plasticity and its  
903 influence on stress tolerance. *Molecular Ecology*, 30(6), 1381–1397.
- 904 Rivest, E. B., Chen, C.-S., Fan, T.-Y., Li, H.-H., & Hofmann, G. E. (2017). Lipid consumption in coral  
905 larvae differs among sites: a consideration of environmental history in a global ocean change  
906 scenario. *Proceedings. Biological Sciences / The Royal Society*, 284(1853).  
907 <https://doi.org/10.1098/rspb.2016.2825>
- 908 Rumble, S. M., Lacroute, P., Dalca, A. V., Fiume, M., Sidow, A., & Brudno, M. (2009). SHRiMP:  
909 accurate mapping of short color-space reads. *PLoS Computational Biology*, 5(5), e1000386.
- 910 Santoro, E. P., Borges, R. M., Espinoza, J. L., Freire, M., Messias, C. S. M. A., Villela, H. D. M.,  
911 Pereira, L. M., Vilela, C. L. S., Rosado, J. G., Cardoso, P. M., Rosado, P. M., Assis, J. M.,  
912 Duarte, G. A. S., Perna, G., Rosado, A. S., Macrae, A., Dupont, C. L., Nelson, K. E., Sweet, M.  
913 J., ... Peixoto, R. S. (2021). Coral microbiome manipulation elicits metabolic and genetic  
914 restructuring to mitigate heat stress and evade mortality. *Science Advances*, 7(33).  
915 <https://doi.org/10.1126/sciadv.abg3088>
- 916 Sewell, M. A. (2005). Utilization of lipids during early development of the sea urchin *Evechinus*  
917 *chloroticus*. *Marine Ecology Progress Series*, 304, 133–142.
- 918 Smith, K. M., Payton, T. G., Sims, R. J., Stroud, C. S., Jeanes, R. C., Hyatt, T. B., & Childress, M. J.  
919 (2019). Impacts of consecutive bleaching events and local algal abundance on transplanted

- 920 coral colonies in the Florida Keys. *Coral Reefs* , 38(4), 851–861.
- 921 Spalding, M. D., & Brown, B. E. (2015). Warm-water coral reefs and climate change. *Science*,  
922 350(6262), 769–771.
- 923 Steffen, W., Crutzen, J., & McNeill, J. R. (2007). The Anthropocene: are humans now overwhelming  
924 the great forces of Nature? *Ambio*, 36(8), 614–621.
- 925 Strader, M. E., & Quigley, K. M. (2022). The role of gene expression and symbiosis in reef-building  
926 coral acquired heat tolerance. *Nature Communications*, 13(1), 4513.
- 927 Szmant, A. M. (1991). Sexual reproduction by the Caribbean reef corals *Montastrea annularis* and  
928 *M. cavernosa*. In *Marine Ecology Progress Series* (Vol. 74, pp. 13–25).  
929 <https://doi.org/10.3354/meps074013>
- 930 Szmant, A. M., & Gassman, N. J. (1990). The effects of prolonged ?bleaching? on the tissue  
931 biomass and reproduction of the reef coral *Montastrea annularis*. *Coral Reefs* , 8(4), 217–224.
- 932 Tebbett, S. B., Connolly, S. R., & Bellwood, D. R. (2023). Benthic composition changes on coral  
933 reefs at global scales. *Nature Ecology & Evolution*, 7(1), 71–81.
- 934 Therneau, T.M., 2018. *coxme: Mixed Effects Cox Models*.
- 935 Thomas, L., Rose, N. H., Bay, R. A., López, E. H., Morikawa, M. K., Ruiz-Jones, L., & Palumbi, S. R.  
936 (2018). Mechanisms of Thermal Tolerance in Reef-Building Corals across a Fine-Grained  
937 Environmental Mosaic: Lessons from Ofu, American Samoa. *Frontiers in Marine Science*, 4.  
938 <https://doi.org/10.3389/fmars.2017.00434>
- 939 Van Oppen, M. J. H., & Oliver, J. K. (2015). Building coral reef resilience through assisted evolution.  
940 *Proceedings of the*. <https://www.pnas.org/doi/abs/10.1073/pnas.1422301112>
- 941 Ward, S., Harrison, P., & Hoegh-Guldberg, O. (2002). *Coral bleaching reduces reproduction of*  
942 *scleractinian corals and increases susceptibility to future stress*. Citeseer.  
943 [https://citeseerx.ist.psu.edu/document?repid=rep1&type=pdf&doi=a89fef240206d9247370e78c9](https://citeseerx.ist.psu.edu/document?repid=rep1&type=pdf&doi=a89fef240206d9247370e78c9c267c3ac1bffb42)  
944 [c267c3ac1bffb42](https://citeseerx.ist.psu.edu/document?repid=rep1&type=pdf&doi=a89fef240206d9247370e78c9c267c3ac1bffb42)
- 945 Williams, D. E., Miller, M. W., & Kramer, K. L. (2008). Recruitment failure in Florida Keys *Acropora*  
946 *palmata*, a threatened Caribbean coral. *Coral Reefs* , 27(3), 697–705.

947 Zhang, Y., Barnes, S. J., & Kenkel, C. D. (2022). Cross-generational heritability analysis of  
948 physiological traits in *Porites astreoides* across an inshore-offshore gradient in the Lower  
949 Florida Keys. *Coral Reefs* , 41(6), 1681–1692.

950

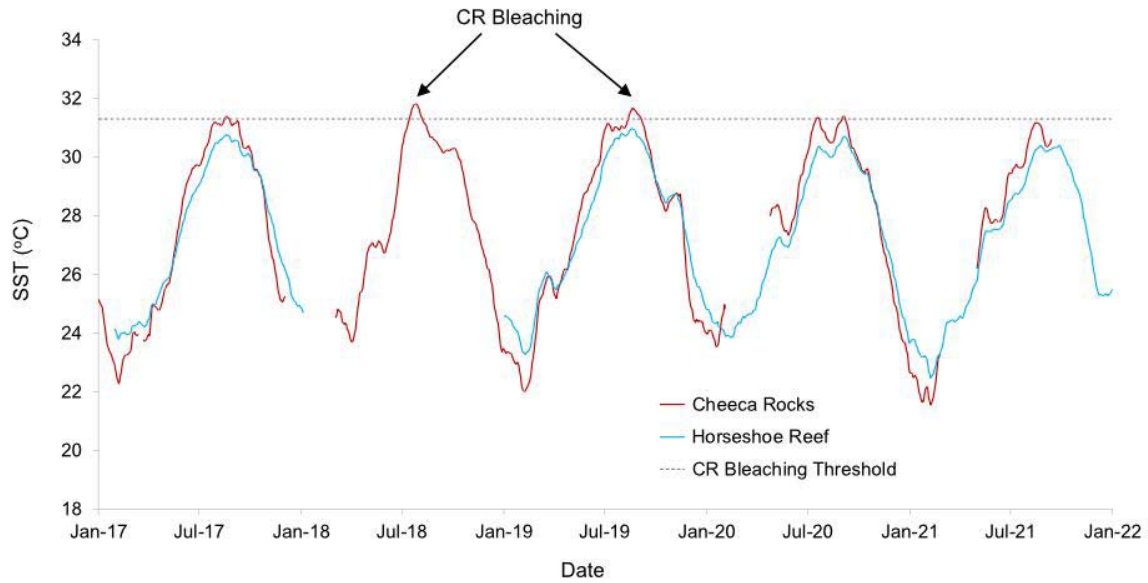

Fig. 1 Time series of running 30-day mean sea surface temperature (SST) for Cheeca Rocks (red line) and Horseshoe Reef (blue line) from 2017 to 2021. Bleaching threshold for Cheeca Rocks (monthly mean SST  $\geq 31.3^{\circ}\text{C}$ ) shown as dashed black line.

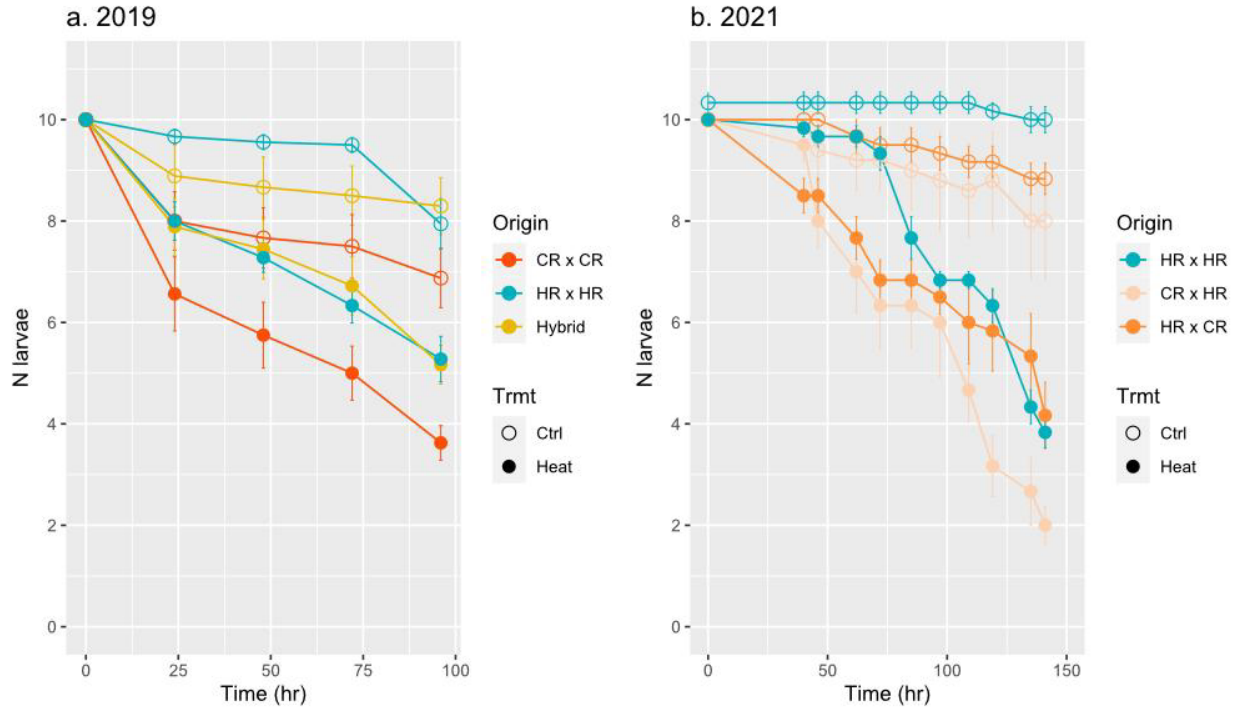

Fig. 2 Number of surviving larvae (mean  $\pm$  standard error of the mean [SEM]) across time in the acute temperature stress experiment for a) 2019 and b) 2021 cohorts. Survivorship was grouped by larval origin and treatment condition.

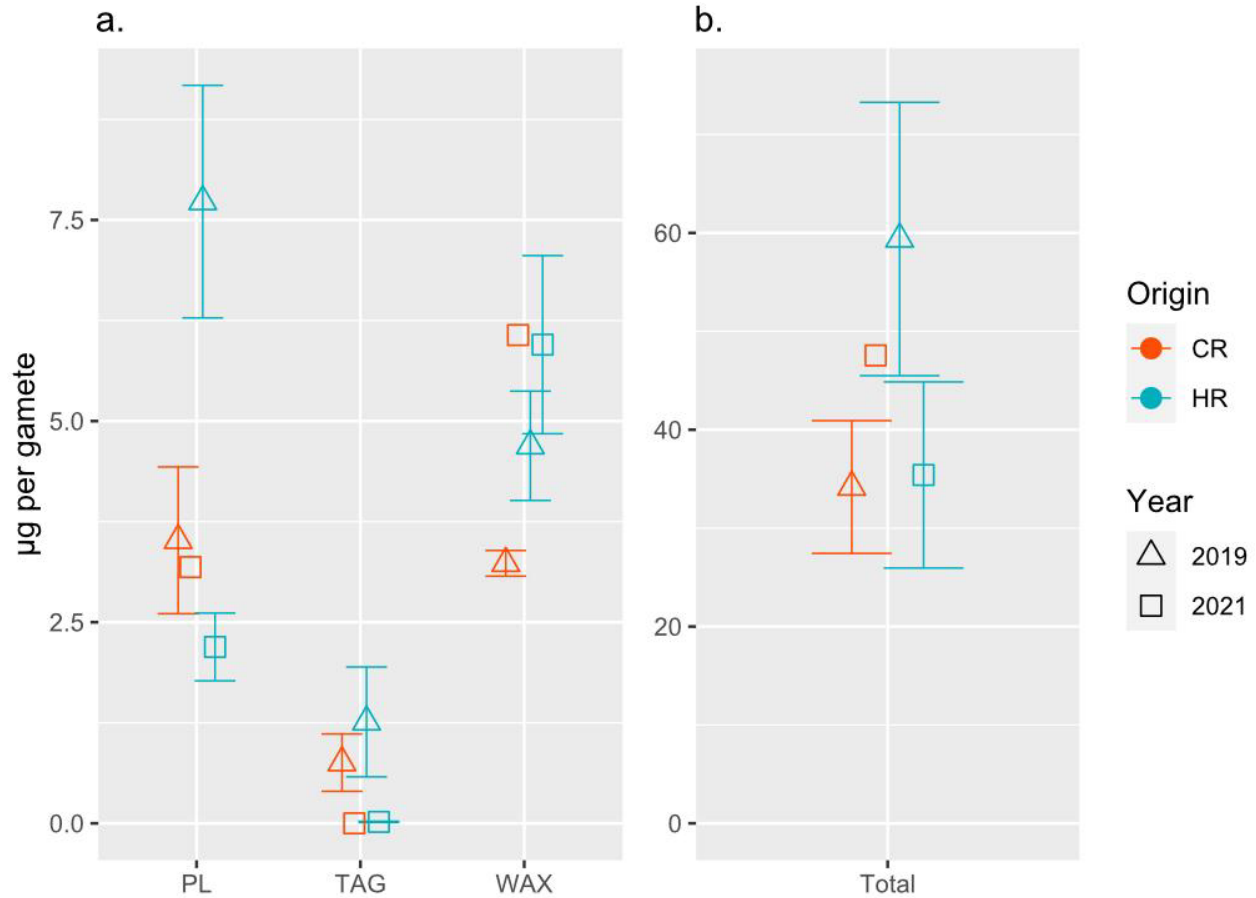

Fig. 3 Concentration (mean  $\pm$  SEM) of (a) different lipid classes (PL: phospholipid, TAG: triacylglycerol, WAX: wax ester) and (b) total lipids standardized by individual gamete bundle collected from Cheeca Rocks (n = 5) and Horseshoe Reef (n = 5) in 2019 and 2021. No replicates were available for CR gametes in 2021.

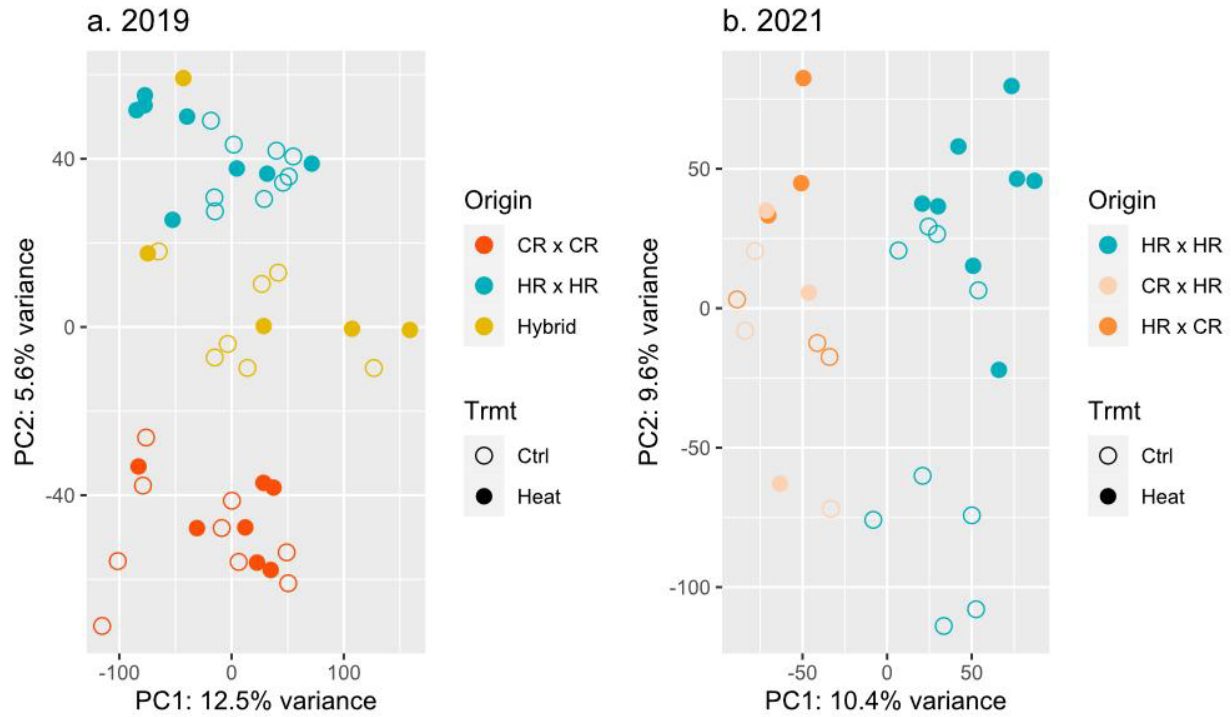

Fig. 4 Principal component analysis (PCA) on *rlog*-transformed read counts in a) 2019 and b) 2021 larval datasets. Points are colored by origin and shaped by treatment. The percentage variance explained by each PC is reflected on the axis label.



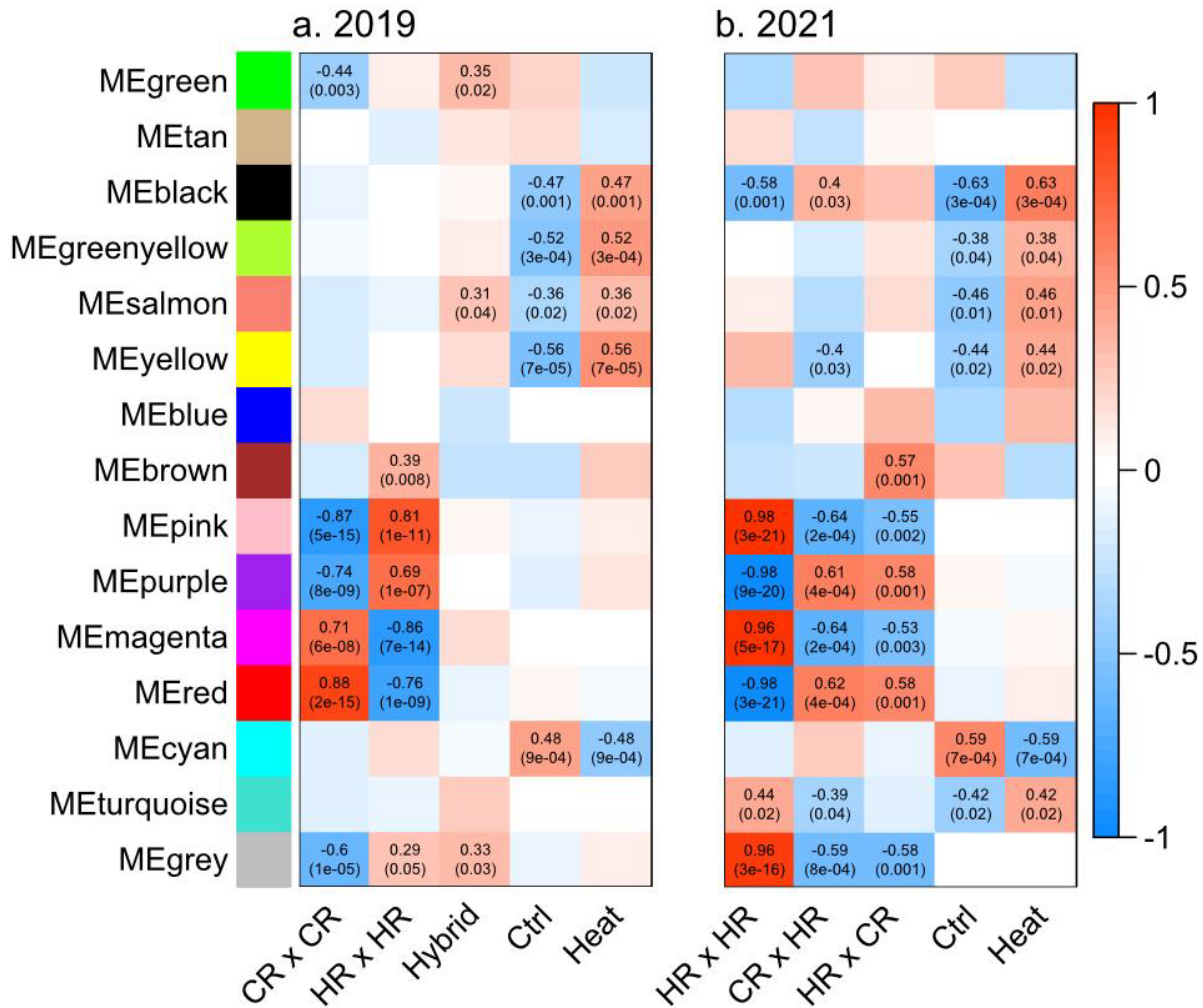

Fig. 5 Weighted gene co-expression network analysis (WGCNA) module-trait relationships identified in a) 2019 and b) 2021 larval cohort. Correlation values range from 1 (red) to -1 (blue) and the associated  $p$  values were included in the parenthesis below for modules showing a significant trait association, with color of each block determined by strength and direction of the correlation between given module and trait.

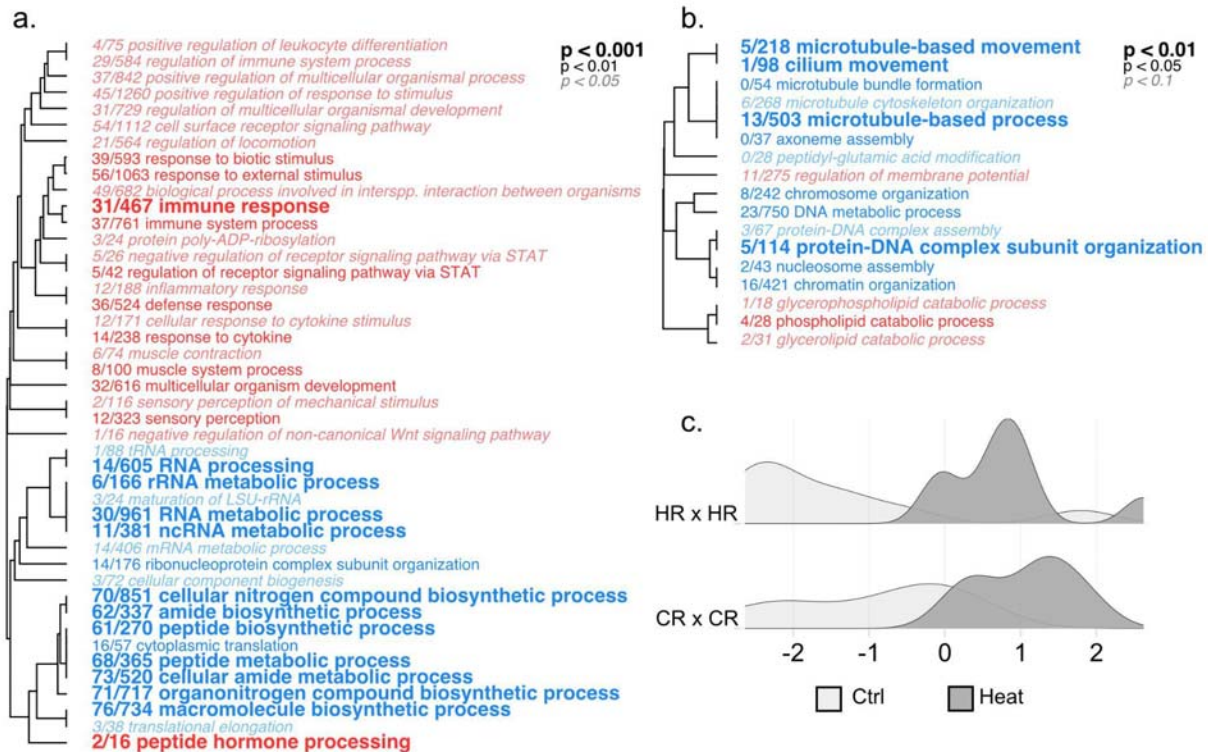

Fig. 6 Hierarchical clustering of ontology terms enriched by genes up-regulated (red) or down-regulated (blue) in 2019 heat-treated (a) CR x CR larvae and (b) HR x HR larvae compared to their respective untreated control, summarized by biological process (BP). Font size indicates level of statistical significance (FDR-corrected). Term names are preceded by fractions indicating the number of individual genes within each term differentially regulated with respect to treatment (unadjusted  $p < 0.05$ ). (c) Density plots showing distribution of global expression across samples from the two origins along the temperature responsive axis (linear discriminant 2 [LD2], Fig. S7) based on discriminant analysis of principal components (DAPC) performed on variance stabilized data (VSD) grouped by treatment and origin.
